# Supplementary material for: Introgression from farmed escapees affects the full life cycle of wild Atlantic salmon
Source: PubMed Central journal article supplement (PMC8694624; doi:10.1126/sciadv.abj3397), 2021-12-22
Supplement: sciadv.abj3397_sm.pdf [file sciadv.abj3397_sm.pdf]

Supplementary Materials for  
**Introgression from farmed escapees affects the full life cycle of wild  
Atlantic salmon**

Geir H. Bolstad\*, Sten Karlsson, Ingerid J. Hagen, Peder Fiske, Kurt Urdal, Harald Sægrov,  
Bjørn Florø-Larsen, Vegard P. Sollien, Gunnel Østborg, Ola H. Diserud,  
Arne J. Jensen, Kjetil Hindar

\*Corresponding author. Email: [geir.bolstad@nina.no](mailto:geir.bolstad@nina.no)

Published 22 December 2021, *Sci. Adv.* 7, eabj3397 (2021)  
DOI: [10.1126/sciadv.abj3397](https://doi.org/10.1126/sciadv.abj3397)

**This PDF file includes:**

Figs. S1 and S2  
Tables S1 to S7

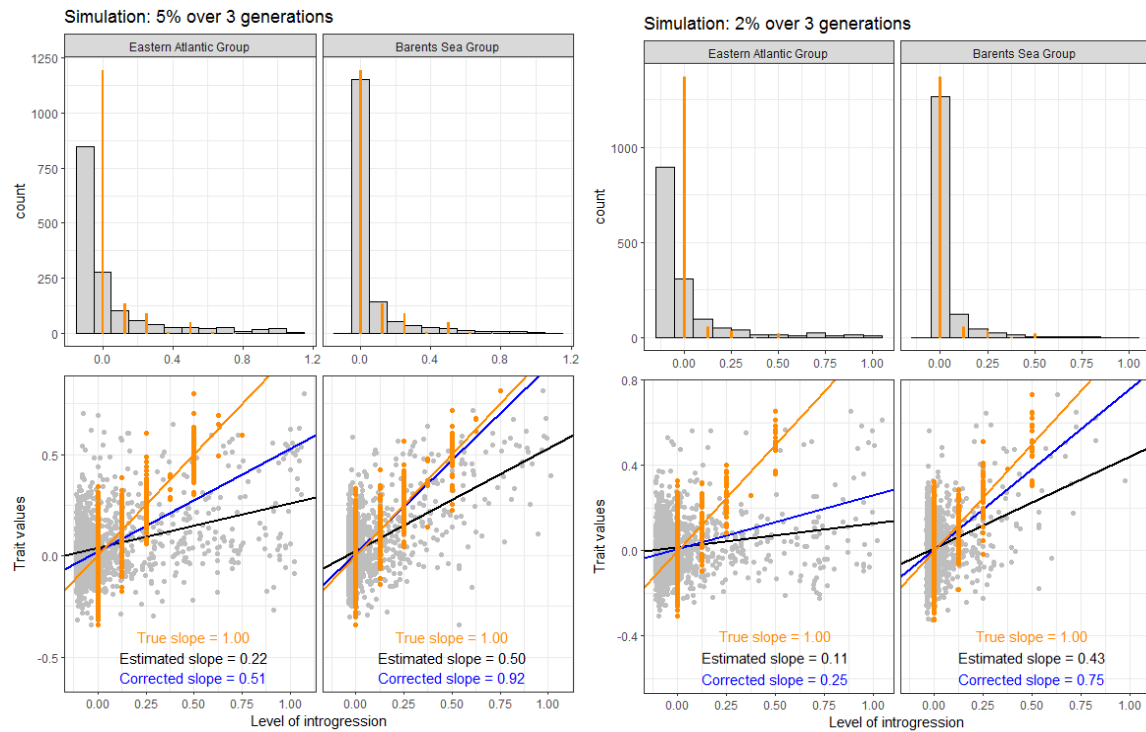

**Figure S1. Evaluation of the bias correction method.** Simulated data showing the effect of uncertainty in the level of introgression on the observed distribution of estimates (upper panel) and its estimated effect on trait values (lower panel). The true value of each individual and the true regression lines are shown in orange, while the estimated value is shown in grey and the estimated regression line in black. In blue, the bias corrected slope is given after the method described in the methods in the main text. Simulations shown for two different scenarios, one with a relatively high number of domesticated spawners (5% per year) in the population, and the other with relatively low (2%). Details of the simulation are given in the supplement of Bolstad et al. (30) under “Simulation of the effect of uncertainty in the estimated level of introgression”.

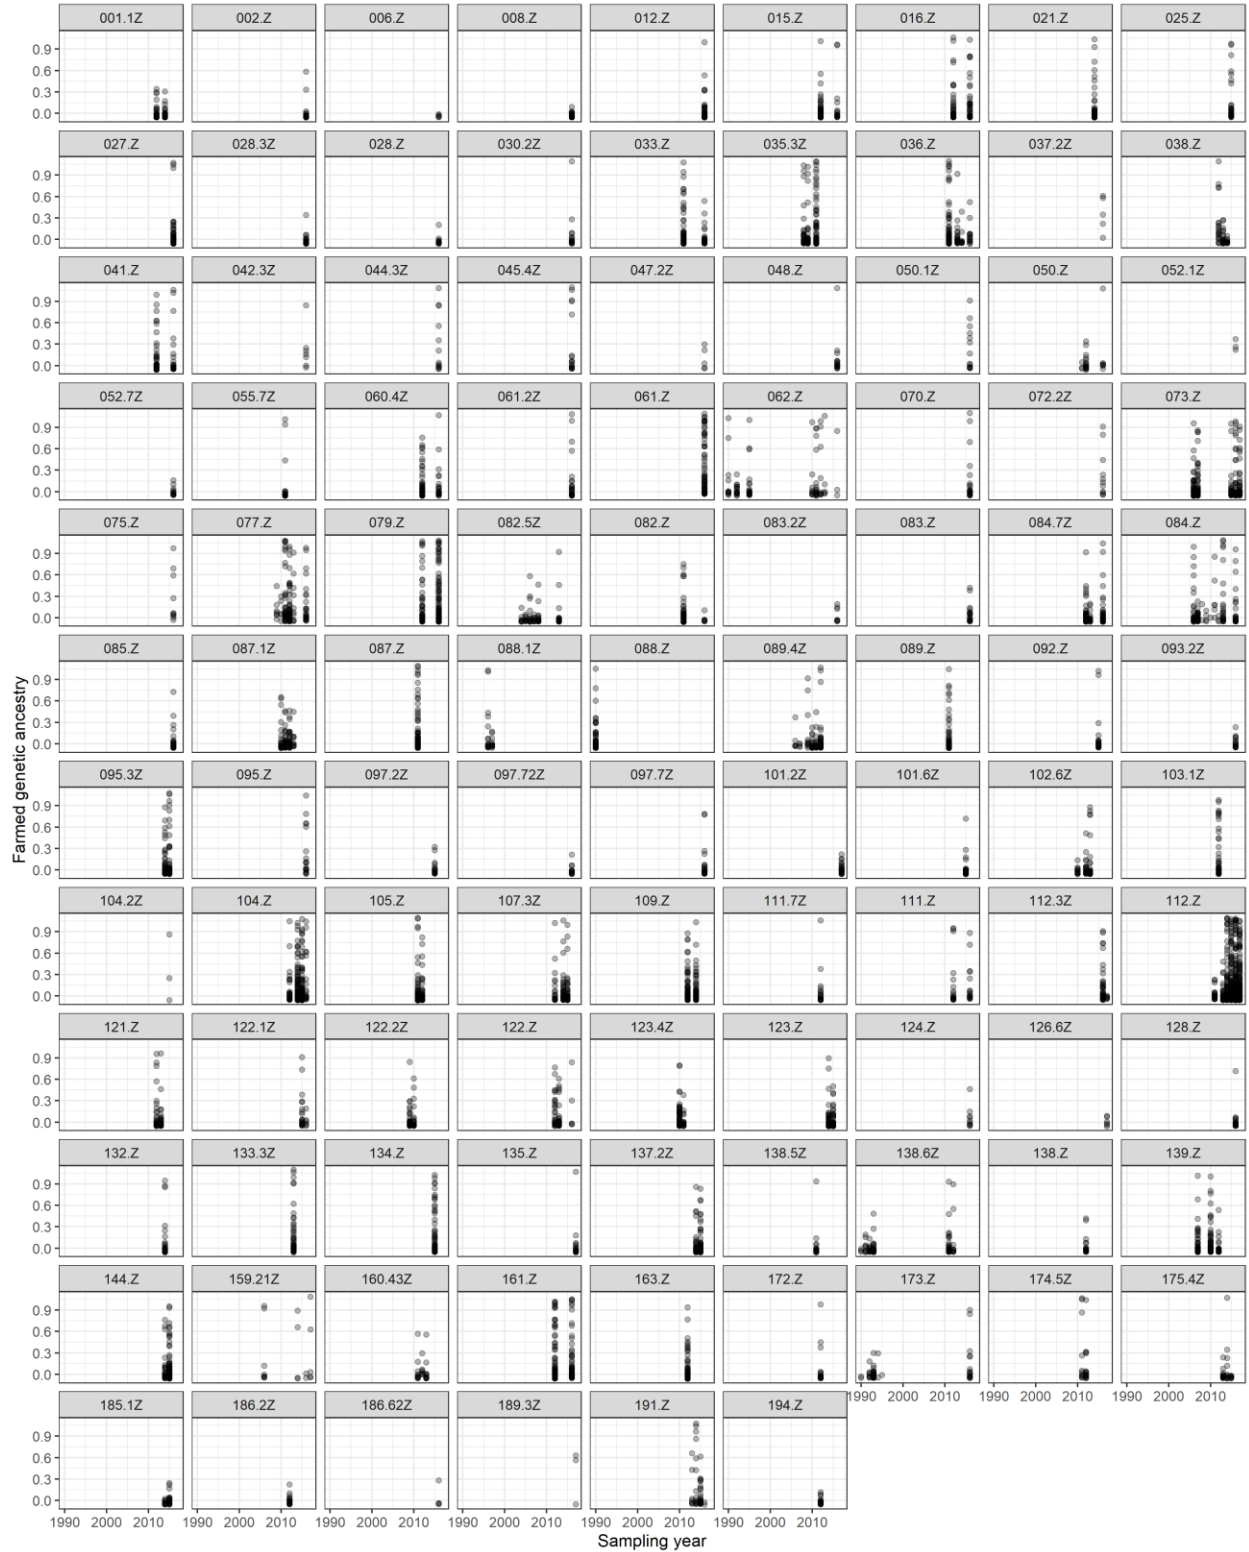

**Figure S2. Distribution of estimated farmed genetic ancestry of individual fish over rivers and sampling years.** See table S7 for river ID codes. The rivers are ordered from south to north.

**Table S1. Model selection table.** Change in Akaike's Information Criterion ( $\Delta$ AIC) when the indicated interaction or randomly varying intercept is added to the model. Maximum likelihood (ML) was used to calculate  $\Delta$ AIC for fixed effects, and restricted maximum likelihood (REML) for random effects.

| Model                                             | Interaction between farmed genetic ancestry and |                 | Randomly varying effect of farmed genetic ancestry | $\Delta$ AIC        |
|---------------------------------------------------|-------------------------------------------------|-----------------|----------------------------------------------------|---------------------|
|                                                   | Average smolt age                               | Average sea age |                                                    |                     |
| <i>Probability of smolting at 2+</i>              | X                                               |                 |                                                    | 1.1                 |
|                                                   |                                                 | X               | X                                                  | <b>-0.3</b><br>2.0  |
| <i>Probability of smolting at 3+</i>              | X                                               |                 |                                                    | 1.9                 |
|                                                   |                                                 | X               | X                                                  | 1.7<br>3.5          |
| <i>Back-calculated freshwater growth</i>          | X                                               |                 |                                                    | 2.0                 |
|                                                   |                                                 | X               | X                                                  | 1.5<br>2.0          |
| <i>Back-calculated freshwater size</i>            | X                                               |                 |                                                    | 2.0                 |
|                                                   |                                                 | X               | X                                                  | 1.2<br>3.4          |
| <i>Probability of maturing as ISW for females</i> | X                                               |                 |                                                    | 1.1                 |
|                                                   |                                                 | X               | X                                                  | <b>-2.4</b><br>2.0  |
| <i>Probability of maturing as ISW for males</i>   | X                                               |                 |                                                    | 1.5                 |
|                                                   |                                                 | X               | X                                                  | 2.0<br>2.5          |
| <i>Probability of maturing as 2SW for females</i> | X                                               |                 |                                                    | 0.2                 |
|                                                   |                                                 | X               | X                                                  | 1.6<br>1.9          |
| <i>Probability of maturing as 2SW for males</i>   | X                                               |                 |                                                    | <b>-1.4</b><br>1.8  |
|                                                   |                                                 | X               | X                                                  | 3.0                 |
| <i>Length at age</i>                              | X                                               |                 |                                                    | 0.7                 |
|                                                   |                                                 | X               | X                                                  | <b>-5.9</b><br>0.5  |
| <i>Mass at age:</i>                               | X                                               |                 |                                                    | 1.1                 |
|                                                   |                                                 | X               | X                                                  | <b>-5.2</b><br>3.5  |
| <i>Annual growth at sea</i>                       | X                                               |                 |                                                    | -1.6                |
|                                                   |                                                 | X               | X                                                  | -3.5<br><b>-3.7</b> |
| <i>Growth first year at sea:</i>                  | X                                               |                 |                                                    | 1.6                 |
|                                                   |                                                 | X               | X                                                  | 2.0<br>1.9<br>2.6   |

| Model                             | Interaction between farmed genetic ancestry and |                 | Randomly varying effect of farmed genetic ancestry | ΔAIC         |
|-----------------------------------|-------------------------------------------------|-----------------|----------------------------------------------------|--------------|
|                                   | Average smolt age                               | Average sea age |                                                    |              |
| <i>Growth second year at sea:</i> | X                                               |                 |                                                    | 2.0          |
|                                   |                                                 | X               |                                                    | <b>-2.1</b>  |
|                                   |                                                 |                 | X                                                  | 3.0          |
| <i>Growth third year at sea:</i>  | X                                               |                 |                                                    | 1.7          |
|                                   |                                                 | X               |                                                    | 0.6          |
|                                   |                                                 |                 | X                                                  | 2.6          |
| <i>Plus growth of 1SW:</i>        | X                                               |                 |                                                    | -15.1        |
|                                   |                                                 | X               |                                                    | -6.2         |
|                                   |                                                 |                 | X                                                  | -0.4         |
| <i>Plus growth of 2SW:</i>        | X                                               | X               |                                                    | <b>-16.1</b> |
|                                   | X                                               | X               | X                                                  | -12.5        |
|                                   | X                                               |                 |                                                    | 0.4          |
| <i>Plus growth of 3SW:</i>        |                                                 | X               |                                                    | <b>-0.5</b>  |
|                                   |                                                 |                 | X                                                  | 4.0          |
|                                   | X                                               |                 |                                                    | 1.8          |
|                                   |                                                 | X               |                                                    | 1.8          |
|                                   |                                                 |                 | X                                                  | 3.9          |

**Table S2. Parameter estimates for models on early life history.** Estimate and associated standard error (SE) after correction for attenuation. The correction was done by multiplying the estimate and its standard error by  $k$ . Sample sizes are given by  $n$ . Units are given for each parameter, where “ $a$ ” is farmed genetic ancestry (i.e.  $a = 1$  is 100% farmed genetic ancestry).

| Parameter                                            | Units                         | Estimate | SE    | $k$  |
|------------------------------------------------------|-------------------------------|----------|-------|------|
| <i>Probability of smolting at 2+ (n = 6078):</i>     |                               |          |       |      |
| Intercept                                            | log odds                      | -1.25    | 0.06  |      |
| Effect of population average smolt age               | log odds/year                 | -4.06    | 0.17  |      |
| Effect of population average sea age                 | log odds/year                 | 0.05     | 0.16  |      |
| Effect of introgression                              | log odds/ $a$                 | 1.35     | 0.58  | 4.13 |
| Interaction: sea age and introgression               | log odds/(year $\times$ $a$ ) | 1.50     | 0.99  | 2.15 |
| SD of intercept among years within river             | log odds                      | 0.64     |       |      |
| <i>Probability of smolting at 3+ (n = 4072):</i>     |                               |          |       |      |
| Intercept                                            | log odds                      | 2.71     | 0.14  |      |
| Effect of population average smolt age               | log odds/year                 | -3.92    | 0.26  |      |
| Effect of population average sea age                 | log odds/year                 | -0.01    | 0.28  |      |
| Effect of introgression (log odds/ $a$ )             | log odds/ $a$                 | 0.51     | 0.36  | 1.79 |
| SD of intercept among rivers                         | log odds                      | 0.83     |       |      |
| SD of intercept among years within river             | log odds                      | 0.21     |       |      |
| <i>Back-calculated freshwater growth (n = 3527):</i> |                               |          |       |      |
| Intercept                                            | ln(mm/year)                   | 3.785    | 0.012 |      |
| Contrast 2SW                                         | ln(mm/year)                   | 0.122    | 0.009 |      |
| Contrast 3SW                                         | ln(mm/year)                   | 0.195    | 0.011 |      |
| Contrast 4SW                                         | ln(mm/year)                   | 0.321    | 0.029 |      |
| Contrast 5SW                                         | ln(mm/year)                   | 0.172    | 0.156 |      |
| Effect of population average smolt age               | ln(mm/year)/year              | -0.306   | 0.020 |      |
| Effect of population average sea age                 | ln(mm/year)/year              | -0.040   | 0.031 |      |
| Effect of introgression                              | ln(mm/year)/ $a$              | 0.036    | 0.023 | 1.91 |
| SD of intercept among years within river             | ln(mm/year)                   | 0.163    |       |      |
| <i>Back-calculated freshwater size (n = 3664):</i>   |                               |          |       |      |
| Intercept                                            | ln mm                         | 4.892    | 0.009 |      |
| Contrast 2SW                                         | ln mm                         | 0.013    | 0.007 |      |
| Contrast 3SW                                         | ln mm                         | 0.003    | 0.009 |      |
| Contrast 4SW                                         | ln mm                         | 0.014    | 0.023 |      |
| Contrast 5SW                                         | ln mm                         | 0.027    | 0.114 |      |
| Effect of population average smolt age               | ln(mm)/year                   | 0.009    | 0.014 |      |
| Effect of population average sea age                 | ln(mm)/year                   | 0.065    | 0.021 |      |
| Effect of introgression                              | ln(mm)/ $a$                   | 0.004    | 0.011 | 1*   |
| SD of intercept among rivers                         | ln mm                         | 0.041    |       |      |
| SD of intercept among years within river             | ln mm                         | 0.054    |       |      |

\* The estimated correction factor was negative and therefore ignored (see methods).

**Table S3. Parameter estimates for models on probability on maturing.** Estimates and associated standard error (SE) after correction for attenuation. The correction was done by multiplying the estimate and its standard error by  $k$ . Sample sizes are given by  $n$ . Units are given for each parameter, where “a” is farmed genetic ancestry (i.e.  $a = 1$  is 100% farmed genetic ancestry).

| Parameter                                                     | Units                      | Estimate | SE   | $k$  |
|---------------------------------------------------------------|----------------------------|----------|------|------|
| <i>Probability of maturing as ISW for females (n = 2760):</i> |                            |          |      |      |
| Intercept                                                     | log odds                   | -1.49    | 0.11 |      |
| Contrast to fish caught for broodstock                        | log odds                   | -1.33    | 0.31 |      |
| Contrast to fish caught in scientific fishing                 | log odds                   | 0.02     | 0.20 |      |
| Effect of population average smolt age                        | log odds/year              | 0.00     | 0.14 |      |
| Effect of population average sea age                          | log odds/year              | -3.58    | 0.22 |      |
| Effect of introgression (log odds/a)                          | log odds/a                 | -2.12    | 0.67 | 1.95 |
| Interaction: sea age and introgression                        | log odds/(year $\times$ a) | -5.79    | 2.87 | 3.02 |
| SD of intercept among years                                   | log odds                   | 0.20     |      |      |
| <i>Probability of maturing as ISW for males (n = 2891):</i>   |                            |          |      |      |
| Intercept                                                     | log odds                   | -0.31    | 0.21 |      |
| Contrast to fish caught for broodstock                        | log odds                   | 0.73     | 0.22 |      |
| Contrast to fish caught in scientific fishing                 | log odds                   | 0.61     | 0.21 |      |
| Effect of population average smolt age                        | log odds/year              | 0.22     | 0.12 |      |
| Effect of population average sea age                          | log odds/year              | -2.26    | 0.20 |      |
| Effect of introgression (log odds/a)                          | log odds/a                 | 0.29     | 0.17 | 1*   |
| SD of intercept among rivers                                  | log odds                   | 0.26     |      |      |
| SD of intercept among years                                   | log odds                   | 0.74     |      |      |
| <i>Probability of maturing as 2SW for females (n = 2175):</i> |                            |          |      |      |
| Intercept                                                     | log odds                   | 1.10     | 0.23 |      |
| Contrast to fish caught for broodstock                        | log odds                   | 1.06     | 0.31 |      |
| Contrast to fish caught in scientific fishing                 | log odds                   | -0.25    | 0.30 |      |
| Effect of population average smolt age                        | log odds/year              | -0.30    | 0.21 |      |
| Effect of population average sea age                          | log odds/year              | -3.65    | 0.37 |      |
| Effect of introgression (log odds/a)                          | log odds/a                 | 1.04     | 0.63 | 2.75 |
| SD of intercept among rivers                                  | log odds                   | 0.59     |      |      |
| SD of intercept among years                                   | log odds                   | 0.74     |      |      |
| <i>Probability of maturing as 2SW for males (n = 1583):</i>   |                            |          |      |      |
| Intercept                                                     | log odds                   | 1.15     | 0.24 |      |
| Contrast to fish caught for broodstock                        | log odds                   | 0.26     | 0.32 |      |
| Contrast to fish caught in scientific fishing                 | log odds                   | 0.05     | 0.35 |      |
| Effect of population average smolt age                        | log odds/year              | -0.16    | 0.19 |      |
| Effect of population average sea age                          | log odds/year              | -2.28    | 0.34 |      |
| Effect of introgression (log odds/a)                          | log odds/a                 | 0.02     | 0.26 | 1**  |
| Interaction: smolt age and introgression                      | log odds/(year $\times$ a) | -3.12    | 1.71 | 3.22 |
| SD of intercept among rivers                                  | log odds                   | 0.43     |      |      |
| SD of intercept among years                                   | log odds                   | 0.73     |      |      |

\* The estimated correction factor was negative and therefore ignored (see methods).

\*\* The correction factor was ignored as the original estimate was very close to zero making the correction factor unreasonably large.



**Table S4. Parameter estimates for models on size at return and annual growth at sea.** Estimates and associated standard error (SE) after correction for attenuation. The correction was done by multiplying the estimate and its standard error by  $k$ . Sample sizes are given by  $n$ . Units are given for each parameter, where “a” is farmed genetic ancestry (i.e.  $a = 1$  is 100% farmed genetic ancestry).

| Parameter                                                         | Units                    | Estimate             | SE                   | $k$  |
|-------------------------------------------------------------------|--------------------------|----------------------|----------------------|------|
| <i>Length at age (n = 6227)</i>                                   |                          |                      |                      |      |
| Intercept                                                         | ln(mm)                   | 6.34                 | 0.01                 |      |
| Contrast 2SW                                                      | ln(mm)                   | 0.29                 | 0.00                 |      |
| Contrast 3SW                                                      | ln(mm)                   | 0.46                 | 0.00                 |      |
| Contrast 4SW                                                      | ln(mm)                   | 0.54                 | 0.01                 |      |
| Contrast 5SW                                                      | ln(mm)                   | 0.56                 | 0.02                 |      |
| Contrast to fish caught for broodstock                            | ln(mm)                   | 0.03                 | 0.01                 |      |
| Contrast to fish caught in scientific fishing                     | ln(mm)                   | -0.02                | 0.01                 |      |
| Effect of Julian day                                              | ln(mm)/day               | $2.5 \times 10^{-4}$ | $5.8 \times 10^{-5}$ |      |
| Effect of population average smolt age                            | ln(mm)/year              | 0.010                | 0.009                |      |
| Effect of population average sea age                              | ln(mm)/year              | 0.128                | 0.012                |      |
| Effect of introgression                                           | ln(mm)/a                 | 0.055                | 0.010                | 2.09 |
| Interaction: sea age and introgression                            | ln(mm)/(year $\times$ a) | -0.159               | 0.057                | 3.47 |
| SD of intercept among rivers                                      | ln(mm)                   | 0.036                |                      |      |
| SD of intercept among years                                       | ln(mm)                   | 0.026                |                      |      |
| <i>Mass at age (n = 5581)</i>                                     |                          |                      |                      |      |
| Intercept                                                         | ln(g)                    | 7.33                 | 0.03                 |      |
| Contrast 2SW                                                      | ln(g)                    | 0.90                 | 0.01                 |      |
| Contrast 3SW                                                      | ln(g)                    | 1.44                 | 0.02                 |      |
| Contrast 4SW                                                      | ln(g)                    | 1.65                 | 0.03                 |      |
| Contrast 5SW                                                      | ln(g)                    | 1.74                 | 0.08                 |      |
| Contrast to fish caught for broodstock                            | ln(g)                    | 0.13                 | 0.03                 |      |
| Contrast to fish caught in scientific fishing                     | ln(g)                    | 0.08                 | 0.03                 |      |
| Effect of Julian day                                              | ln(g)/day                | $7.4 \times 10^{-5}$ | $2.0 \times 10^{-4}$ |      |
| Effect of population average smolt age                            | ln(g)/year               | 0.05                 | 0.03                 |      |
| Effect of population average sea age                              | ln(g)/year               | 0.47                 | 0.05                 |      |
| Effect of introgression                                           | ln(g)/a                  | 0.12                 | 0.02                 | 1.03 |
| Interaction: sea age and introgression                            | ln(g)/(year $\times$ a)  | -0.30                | 0.11                 | 2.02 |
| SD of intercept among rivers                                      | ln(g)                    | 0.14                 |                      |      |
| SD of intercept among years                                       | ln(g)                    | 0.08                 |                      |      |
| <i>Effect of introgression on annual growth at sea (n = 3653)</i> |                          |                      |                      |      |
| Intercept                                                         | ln(mm/year)              | 6.03                 | 0.01                 |      |
| Contrast 2SW                                                      | ln(mm/year)              | -0.31                | 0.01                 |      |
| Contrast 3SW                                                      | ln(mm/year)              | -0.49                | 0.01                 |      |
| Contrast 4SW                                                      | ln(mm/year)              | -0.66                | 0.02                 |      |
| Contrast 5SW                                                      | ln(mm/year)              | -0.69                | 0.11                 |      |
| Contrast to fish caught for broodstock                            | ln(mm/year)              | 0.08                 | 0.04                 |      |
| Contrast to fish caught in scientific fishing                     | ln(mm/year)              | 0.01                 | 0.01                 |      |
| Effect of Julian day                                              | ln(mm/year)/day          | $3.6 \times 10^{-4}$ | $0.9 \times 10^{-4}$ |      |

| Parameter                                | Units                  | Estimate | SE    | <i>k</i> |
|------------------------------------------|------------------------|----------|-------|----------|
| Effect of population average smolt age   | ln(mm/year)/year       | 0.025    | 0.011 |          |
| Effect of population average sea age     | ln(mm/year)/year       | 0.151    | 0.016 |          |
| Effect of introgression                  | ln(mm/year)/a          | 0.065    | 0.015 | 1.88     |
| Interaction: smolt age and introgression | ln(mm/year)/(year × a) | -0.032   | 0.022 | 1.37     |
| Interaction: sea age and introgression   | ln(mm/year)/(year × a) | -0.189   | 0.093 | 3.25     |
| SD of intercept among rivers             | ln(mm/year)            | 0.038    |       |          |
| SD of intercept among years              | ln(mm/year)            | 0.031    |       |          |

\* The estimated correction factor was negative and therefore ignored (see methods).

**Table S5. Parameter estimates for models on growth at different periods at sea.** Estimates and associated standard error (SE) after correction for attenuation. The correction was done by multiplying the estimate and its standard error by  $k$ . Sample sizes are given by  $n$ . Units are given for each parameter, where “a” is farmed genetic ancestry (i.e.  $a = 1$  is 100% farmed genetic ancestry).

| Parameter                                     | Units                    | Estimate | SE    | $k$  |
|-----------------------------------------------|--------------------------|----------|-------|------|
| <i>Growth first year at sea (n = 3700)</i>    |                          |          |       |      |
| Intercept                                     | ln(mm)                   | 5.68     | 0.02  |      |
| Contrast 2SW                                  | ln(mm)                   | -0.018   | 0.007 |      |
| Contrast 3SW                                  | ln(mm)                   | -0.037   | 0.010 |      |
| Contrast 4SW                                  | ln(mm)                   | -0.046   | 0.024 |      |
| Contrast 5SW                                  | ln(mm)                   | -0.175   | 0.148 |      |
| Contrast to fish caught for broodstock        | ln(mm)                   | 0.070    | 0.053 |      |
| Contrast to fish caught in scientific fishing | ln(mm)                   | 0.026    | 0.017 |      |
| Effect of population average smolt age        | ln(mm)/year              | -0.004   | 0.012 |      |
| Effect of population average sea age          | ln(mm)/year              | 0.105    | 0.018 |      |
| Effect of introgression                       | ln(mm)/a                 | 0.052    | 0.038 | 3.75 |
| SD of intercept among rivers                  | ln(mm)                   | 0.041    |       |      |
| SD of intercept among years                   | ln(mm)                   | 0.095    |       |      |
| <i>Growth second year at sea (n = 2575)</i>   |                          |          |       |      |
| Intercept                                     | ln(mm)                   | 5.55     | 0.02  |      |
| Contrast 3SW                                  | ln(mm)                   | 0.048    | 0.009 |      |
| Contrast 4SW                                  | ln(mm)                   | 0.006    | 0.026 |      |
| Contrast 5SW                                  | ln(mm)                   | -0.015   | 0.168 |      |
| Contrast to fish caught in scientific fishing | ln(mm)                   | 0.021    | 0.023 |      |
| Effect of population average smolt age        | ln(mm)/year              | 0.045    | 0.016 |      |
| Effect of population average sea age          | ln(mm)/year              | 0.108    | 0.029 |      |
| Effect of introgression                       | ln(mm)/a                 | 0.038    | 0.016 | 1*   |
| Interaction: sea age and introgression        | ln(mm)/(year $\times$ a) | -0.125   | 0.062 | 1*   |
| SD of intercept among rivers                  | ln(mm)                   | 0.053    |       |      |
| SD of intercept among years                   | ln(mm)                   | 0.079    |       |      |
| <i>Growth third year at sea (n = 904)</i>     |                          |          |       |      |
| Intercept                                     | ln(mm)                   | 5.22     | 0.03  |      |
| Contrast 4SW                                  | ln(mm)                   | 0.095    | 0.034 |      |
| Contrast 5SW                                  | ln(mm)                   | 0.415    | 0.206 |      |
| Contrast to fish caught in scientific fishing | ln(mm)                   | -0.018   | 0.040 |      |
| Effect of population average smolt age        | ln(mm)/year              | 0.059    | 0.017 |      |
| Effect of population average sea age          | ln(mm)/year              | 0.012    | 0.036 |      |
| Effect of introgression                       | ln(mm)/a                 | 0.005    | 0.031 | 1*   |
| SD of intercept among rivers                  | ln(mm)                   | 0.021    |       |      |
| SD of intercept among years                   | ln(mm)                   | 0.080    |       |      |
| <i>Plus growth of 1SW (n = 1106)</i>          |                          |          |       |      |
| Intercept                                     | ln(mm)                   | 4.83     | 0.03  |      |
| Contrast to fish caught in broodstock fishing | ln(mm)                   | -0.078   | 0.118 |      |

| Parameter                                     | Units                    | Estimate             | SE                   | <i>k</i> |
|-----------------------------------------------|--------------------------|----------------------|----------------------|----------|
| Contrast to fish caught in scientific fishing | ln(mm)                   | -0.037               | 0.058                |          |
| Effect of Julian day                          | ln(mm)/day               | $2.9 \times 10^{-3}$ | $0.4 \times 10^{-3}$ |          |
| Effect of population average smolt age        | ln(mm)/year              | 0.095                | 0.034                |          |
| Effect of population average sea age          | ln(mm)/year              | 0.266                | 0.047                |          |
| Effect of introgression                       | ln(mm)/a                 | 0.111                | 0.047                | 1.60     |
| Interaction: smolt age and introgression      | ln(mm)/(year $\times$ a) | -0.995               | 0.287                | 4.42     |
| Interaction: sea age and introgression        | ln(mm)/(year $\times$ a) | -0.394               | 0.227                | 2.22     |
| SD of intercept among rivers                  | ln(mm)                   | 0.10                 |                      |          |
| SD of intercept among years                   | ln(mm)                   | 0.10                 |                      |          |
| <i>Plus growth of 2SW (n = 1630)</i>          |                          |                      |                      |          |
| Intercept                                     | ln(mm)                   | 4.13                 | 0.05                 |          |
| Contrast to fish caught in scientific fishing | ln(mm)                   | -0.028               | 0.075                |          |
| Effect of Julian day                          | ln(mm)/day               | $2.3 \times 10^{-3}$ | $0.5 \times 10^{-3}$ |          |
| Effect of population average smolt age        | ln(mm)/year              | 0.117                | 0.041                |          |
| Effect of population average sea age          | ln(mm)/year              | 0.432                | 0.075                |          |
| Effect of introgression                       | ln(mm)/a                 | 0.518                | 0.278                | 5.63     |
| Interaction: sea age and introgression        | ln(mm)/(year $\times$ a) | -1.91                | 1.22                 | 3.84     |
| SD of intercept among rivers                  | ln(mm)                   | 0.33                 |                      |          |
| SD of intercept among years                   | ln(mm)                   | 0.16                 |                      |          |
| <i>Plus growth of 3SW (n = 757)</i>           |                          |                      |                      |          |
| Intercept                                     | ln(mm)                   | 3.08                 | 0.09                 |          |
| Contrast to fish caught in scientific fishing | ln(mm)                   | 0.047                | 0.156                |          |
| Effect of Julian day                          | ln(mm)/day               | $2.9 \times 10^{-3}$ | $1.0 \times 10^{-3}$ |          |
| Effect of population average smolt age        | ln(mm)/year              | 0.131                | 0.075                |          |
| Effect of population average sea age          | ln(mm)/year              | 0.053                | 0.163                |          |
| Effect of introgression                       | ln(mm)/a                 | 0.037                | 0.121                | 1.23     |
| SD of intercept among rivers                  | ln(mm)                   | 0.16                 |                      |          |
| SD of intercept among years                   | ln(mm)                   | 0.22                 |                      |          |

\* The estimated correction factor was negative and therefore ignored (see methods).

**Table S6. Parameter estimates for models on *vgll3* and *six6*.** Estimates and associated standard error (SE) after correction for attenuation. The correction was done by multiplying the estimate and its standard error by  $k$ . Sample sizes are given by  $n$ . Units are given for each parameter, where “p” is the allele frequency of the L-allele, “a” is farmed genetic ancestry (i.e.  $a = 1$  is 100% farmed genetic ancestry).

| Parameter                                                    | Units                     | Estimate | SE    | $k$ |
|--------------------------------------------------------------|---------------------------|----------|-------|-----|
| <i>vgll3</i> L-allele frequency ( $n = 3673$ )               |                           |          |       |     |
| Intercept                                                    | log odds                  | -0.777   | 0.037 |     |
| Contrast to fish caught for broodstock                       | log odds                  | 0.073    | 0.059 |     |
| Contrast to fish caught in scientific fishing                | log odds                  | 0.045    | 0.159 |     |
| Effect of population <i>vgll3</i> allele frequency           | log odds/p                | 4.723    | 0.188 |     |
| Effect of introgression                                      | log odds/a                | 0.085    | 0.112 | 1*  |
| Interaction: <i>vgll3</i> allele frequency and introgression | log odds/( $a \times p$ ) | 0.950    | 0.903 | 1*  |
| SD of intercept among years within rivers                    | log odds                  | 0.027    |       |     |
| <i>six6</i> L-allele frequency ( $n = 3673$ )                |                           |          |       |     |
| Intercept                                                    | log odds                  | 0.319    | 0.036 |     |
| Contrast to fish caught for broodstock                       | log odds                  | 0.094    | 0.062 |     |
| Contrast to fish caught in scientific fishing                | log odds                  | 0.304    | 0.164 |     |
| Effect of population <i>vgll3</i> allele frequency           | log odds/p                | 5.025    | 0.172 |     |
| Effect of introgression                                      | log odds/a                | -0.020   | 0.117 | 1*  |
| Interaction: <i>vgll3</i> allele frequency and introgression | log odds/( $a \times p$ ) | -1.148   | 0.632 | 1*  |
| SD of intercept among individuals                            | log odds                  | 0.438    |       |     |

\* The estimated correction factor was less than one and therefore ignored.

**Table S7. Overview of data.** Columns represent the River ID\*, name, number of females (N fem), number of males (N male), number with unknown sex (N sex unkn.) and total number of fish (N total), percentage of data considered representative for late life history (Repr.), percentage from recreational (Recr.), broodstock (Brood.), and scientific fishing (Scient.).

| River ID* | River name      | N fem | N male | N sex unkn. | N total | Repr. | Recr. | Brood. | Scient. |
|-----------|-----------------|-------|--------|-------------|---------|-------|-------|--------|---------|
| 001.1Z    | Enningdalselva  | 49    | 70     | 0           | 119     | 92 %  | 100 % | 0 %    | 0 %     |
| 002.Z     | Glomma          | 8     | 11     | 0           | 19      | 100 % | 0 %   | 100 %  | 0 %     |
| 006.Z     | Akerselva       | 3     | 2      | 0           | 5       | 0 %   | 0 %   | 100 %  | 0 %     |
| 008.Z     | Sandvikselva    | 26    | 18     | 1           | 45      | 100 % | 0 %   | 100 %  | 0 %     |
| 012.Z     | Drammenselva    | 31    | 22     | 3           | 56      | 100 % | 0 %   | 100 %  | 0 %     |
| 015.Z     | Numedalslågen   | 36    | 16     | 45          | 97      | 90 %  | 80 %  | 20 %   | 0 %     |
| 016.Z     | SkienSVassd.    | 56    | 40     | 13          | 109     | 100 % | 63 %  | 37 %   | 0 %     |
| 021.Z     | Otra            | 18    | 25     | 15          | 58      | 100 % | 100 % | 0 %    | 0 %     |
| 025.Z     | Kvina           | 13    | 15     | 0           | 28      | 100 % | 100 % | 0 %    | 0 %     |
| 027.Z     | Bjerkreimselva  | 58    | 44     | 4           | 106     | 100 % | 0 %   | 100 %  | 0 %     |
| 028.3Z    | Håelva          | 15    | 5      | 0           | 20      | 100 % | 0 %   | 100 %  | 0 %     |
| 028.Z     | Figgjo          | 7     | 5      | 0           | 12      | 0 %   | 0 %   | 100 %  | 0 %     |
| 030.2Z    | Dirdalselva     | 8     | 9      | 0           | 17      | 100 % | 0 %   | 100 %  | 0 %     |
| 033.Z     | Årdalselva      | 49    | 68     | 19          | 136     | 93 %  | 78 %  | 22 %   | 0 %     |
| 035.3Z    | Vorma           | 57    | 67     | 39          | 163     | 100 % | 100 % | 0 %    | 0 %     |
| 036.Z     | Suldalslågen    | 71    | 83     | 2           | 156     | 94 %  | 90 %  | 10 %   | 0 %     |
| 037.2Z    | Åbøelva         | 3     | 2      | 0           | 5       | 0 %   | 0 %   | 100 %  | 0 %     |
| 038.Z     | Vikedalselva    | 33    | 21     | 0           | 54      | 100 % | 0 %   | 0 %    | 100 %   |
| 041.Z     | Etneelva        | 39    | 44     | 11          | 94      | 100 % | 73 %  | 27 %   | 0 %     |
| 042.3Z    | Fjæraelva       | 3     | 3      | 1           | 7       | 100 % | 0 %   | 100 %  | 0 %     |
| 044.3Z    | Ådlandsvassd    | 8     | 5      | 0           | 13      | 100 % | 0 %   | 100 %  | 0 %     |
| 045.4Z    | Rosendalselvene | 10    | 8      | 0           | 18      | 100 % | 0 %   | 100 %  | 0 %     |
| 047.2Z    | Jondalselva     | 2     | 2      | 1           | 5       | 100 % | 0 %   | 100 %  | 0 %     |
| 048.Z     | Opo             | 8     | 8      | 1           | 17      | 100 % | 0 %   | 100 %  | 0 %     |
| 050.1Z    | Kinso           | 8     | 6      | 0           | 14      | 100 % | 0 %   | 100 %  | 0 %     |
| 050.Z     | Eidfjordvassd.  | 20    | 6      | 2           | 28      | 100 % | 75 %  | 25 %   | 0 %     |
| 052.1Z    | Granvinselva    | 3     | 0      | 0           | 3       | 100 % | 0 %   | 100 %  | 0 %     |
| 052.7Z    | Steindalselva   | 7     | 6      | 0           | 13      | 100 % | 0 %   | 100 %  | 0 %     |
| 055.7Z    | Oselva          | 6     | 8      | 6           | 20      | 100 % | 100 % | 0 %    | 0 %     |
| 060.4Z    | Loneelva        | 44    | 41     | 13          | 98      | 100 % | 70 %  | 30 %   | 0 %     |
| 061.2Z    | Storelva        | 18    | 12     | 0           | 30      | 100 % | 0 %   | 100 %  | 0 %     |
| 061.Z     | Daleelva        | 39    | 25     | 0           | 64      | 100 % | 0 %   | 100 %  | 0 %     |
| 062.Z     | Vosso           | 44    | 47     | 0           | 91      | 100 % | 12 %  | 3 %    | 85 %    |
| 070.Z     | Vikja           | 15    | 6      | 2           | 23      | 100 % | 0 %   | 100 %  | 0 %     |
| 072.2Z    | Flåmselva       | 5     | 6      | 0           | 11      | 100 % | 0 %   | 100 %  | 0 %     |
| 073.Z     | Lærdalselva     | 91    | 118    | 22          | 231     | 65 %  | 100 % | 0 %    | 0 %     |
| 075.Z     | Fortunselva     | 2     | 8      | 0           | 10      | 100 % | 0 %   | 100 %  | 0 %     |
| 077.Z     | Årøyelva        | 73    | 56     | 4           | 133     | 73 %  | 80 %  | 20 %   | 0 %     |
| 079.Z     | Daleelva        | 127   | 91     | 4           | 222     | 97 %  | 97 %  | 3 %    | 0 %     |
| 082.5Z    | Storelva        | 31    | 32     | 17          | 80      | 100 % | 100 % | 0 %    | 0 %     |

| River ID* | River name      | N fem | N male | N sex<br>unkn. | N total | Repr. | Recr. | Brood. | Scient. |
|-----------|-----------------|-------|--------|----------------|---------|-------|-------|--------|---------|
| 082.Z     | Flekkeelva      | 60    | 51     | 5              | 116     | 85 %  | 94 %  | 6 %    | 0 %     |
| 083.2Z    | Kvamselva       | 4     | 4      | 0              | 8       | 0 %   | 0 %   | 100 %  | 0 %     |
| 083.Z     | Gaula           | 15    | 6      | 0              | 21      | 0 %   | 0 %   | 100 %  | 0 %     |
| 084.7Z    | Nausta          | 77    | 34     | 16             | 127     | 100 % | 66 %  | 34 %   | 0 %     |
| 084.Z     | Jølstra         | 63    | 54     | 10             | 127     | 100 % | 76 %  | 20 %   | 3 %     |
| 085.Z     | Osenelva        | 24    | 13     | 0              | 37      | 100 % | 0 %   | 100 %  | 0 %     |
| 087.1Z    | Ryggelva        | 34    | 47     | 28             | 109     | 100 % | 100 % | 0 %    | 0 %     |
| 087.Z     | Gloppenelva     | 53    | 53     | 2              | 108     | 100 % | 100 % | 0 %    | 0 %     |
| 088.1Z    | Oldenelva       | 13    | 8      | 8              | 29      | 100 % | 100 % | 0 %    | 0 %     |
| 088.Z     | Strynselva      | 44    | 23     | 0              | 67      | 100 % | 100 % | 0 %    | 0 %     |
| 089.4Z    | Hjalma          | 46    | 57     | 3              | 106     | 100 % | 100 % | 0 %    | 0 %     |
| 089.Z     | Eidselva        | 51    | 45     | 14             | 110     | 100 % | 100 % | 0 %    | 0 %     |
| 092.Z     | Åheimselva      | 8     | 8      | 12             | 28      | 100 % | 100 % | 0 %    | 0 %     |
| 093.2Z    | Oselva          | 14    | 3      | 0              | 17      | 100 % | 0 %   | 100 %  | 0 %     |
| 095.3Z    | Vartdalselv     | 27    | 61     | 12             | 100     | 100 % | 100 % | 0 %    | 0 %     |
| 095.Z     | Ørstaelva       | 14    | 5      | 0              | 19      | 0 %   | 0 %   | 100 %  | 0 %     |
| 097.2Z    | Vikelva         | 10    | 8      | 0              | 18      | 100 % | 100 % | 0 %    | 0 %     |
| 097.72Z   | Aureelva        | 9     | 6      | 0              | 15      | 0 %   | 0 %   | 100 %  | 0 %     |
| 097.7Z    | Velledalselva   | 16    | 13     | 0              | 29      | 100 % | 0 %   | 100 %  | 0 %     |
| 101.2Z    | Solnørelva      | 23    | 18     | 1              | 42      | 100 % | 100 % | 0 %    | 0 %     |
| 101.6Z    | Tennfjordelva   | 6     | 12     | 12             | 30      | 100 % | 100 % | 0 %    | 0 %     |
| 102.6Z    | Tressa          | 48    | 15     | 7              | 70      | 100 % | 100 % | 0 %    | 0 %     |
| 103.1Z    | Måna            | 29    | 13     | 9              | 51      | 100 % | 100 % | 0 %    | 0 %     |
| 104.2Z    | Visa            | 2     | 1      | 0              | 3       | 100 % | 100 % | 0 %    | 0 %     |
| 104.Z     | Eira            | 124   | 149    | 8              | 281     | 52 %  | 93 %  | 7 %    | 0 %     |
| 105.Z     | Oselva          | 71    | 49     | 27             | 147     | 100 % | 69 %  | 0 %    | 31 %    |
| 107.3Z    | Sylteelva       | 34    | 34     | 51             | 119     | 100 % | 100 % | 0 %    | 0 %     |
| 109.Z     | Driva           | 46    | 75     | 66             | 187     | 100 % | 71 %  | 0 %    | 29 %    |
| 111.7Z    | Søya            | 9     | 9      | 2              | 20      | 100 % | 100 % | 0 %    | 0 %     |
| 111.Z     | Todalselva      | 22    | 13     | 2              | 37      | 100 % | 54 %  | 46 %   | 0 %     |
| 112.3Z    | Bævra           | 25    | 15     | 6              | 46      | 100 % | 70 %  | 30 %   | 0 %     |
| 112.Z     | Surna           | 161   | 439    | 70             | 670     | 99 %  | 91 %  | 6 %    | 3 %     |
| 121.Z     | Orkla           | 9     | 45     | 4              | 58      | 100 % | 100 % | 0 %    | 0 %     |
| 122.1Z    | Børselva        | 18    | 8      | 1              | 27      | 100 % | 52 %  | 0 %    | 48 %    |
| 122.2Z    | Vigda           | 36    | 12     | 5              | 53      | 100 % | 100 % | 0 %    | 0 %     |
| 122.Z     | Gaulavassd      | 25    | 34     | 6              | 65      | 92 %  | 92 %  | 8 %    | 0 %     |
| 123.4Z    | Homla           | 34    | 20     | 15             | 69      | 100 % | 100 % | 0 %    | 0 %     |
| 123.Z     | Nidelva         | 56    | 43     | 1              | 100     | 100 % | 100 % | 0 %    | 0 %     |
| 124.Z     | Stjørdalsvassd. | 9     | 1      | 0              | 10      | 0 %   | 0 %   | 100 %  | 0 %     |
| 126.6Z    | Levangerelva    | 5     | 1      | 0              | 6       | 100 % | 100 % | 0 %    | 0 %     |
| 128.Z     | Steinkjervassd. | 11    | 10     | 0              | 21      | 100 % | 0 %   | 100 %  | 0 %     |
| 132.Z     | Skauga          | 20    | 14     | 0              | 34      | 100 % | 0 %   | 0 %    | 100 %   |
| 133.3Z    | Nordelva        | 13    | 22     | 10             | 45      | 100 % | 100 % | 0 %    | 0 %     |

| River ID* | River name     | N fem | N male | N sex<br>unkn. | N total | Repr. | Recr. | Brood. | Scient. |
|-----------|----------------|-------|--------|----------------|---------|-------|-------|--------|---------|
| 134.Z     | Teksdalselva   | 30    | 19     | 6              | 55      | 100 % | 100 % | 0 %    | 0 %     |
| 135.Z     | Norrdalselva   | 9     | 7      | 5              | 21      | 100 % | 100 % | 0 %    | 0 %     |
| 137.2Z    | Steinsdalselva | 55    | 36     | 8              | 99      | 100 % | 63 %  | 0 %    | 37 %    |
| 138.5Z    | Aursunda       | 0     | 0      | 19             | 19      | 100 % | 100 % | 0 %    | 0 %     |
| 138.6Z    | Bogna          | 30    | 8      | 49             | 87      | 100 % | 11 %  | 89 %   | 0 %     |
| 138.Z     | Årgårdsvassd.  | 8     | 6      | 6              | 20      | 100 % | 100 % | 0 %    | 0 %     |
| 139.Z     | Namsen         | 21    | 55     | 60             | 136     | 93 %  | 85 %  | 0 %    | 15 %    |
| 144.Z     | Åelva          | 46    | 39     | 12             | 97      | 100 % | 100 % | 0 %    | 0 %     |
| 159.21Z   | Gjervalelva    | 8     | 10     | 1              | 19      | 100 % | 100 % | 0 %    | 0 %     |
| 160.43Z   | Reipåvassd.    | 12    | 16     | 1              | 29      | 100 % | 100 % | 0 %    | 0 %     |
| 161.Z     | Beiarvassd.    | 64    | 86     | 4              | 154     | 97 %  | 63 %  | 37 %   | 0 %     |
| 163.Z     | Saltdalsvassd. | 16    | 80     | 2              | 98      | 100 % | 99 %  | 0 %    | 1 %     |
| 172.Z     | Forsåvassd.    | 16    | 4      | 0              | 20      | 100 % | 100 % | 0 %    | 0 %     |
| 173.Z     | Skjoma         | 37    | 26     | 1              | 64      | 98 %  | 73 %  | 0 %    | 27 %    |
| 174.5Z    | Elvegårdselva  | 13    | 14     | 0              | 27      | 70 %  | 100 % | 0 %    | 0 %     |
| 175.4Z    | Tårstadvassd.  | 17    | 16     | 2              | 35      | 100 % | 100 % | 0 %    | 0 %     |
| 185.1Z    | Alsvågvasd.    | 16    | 20     | 2              | 38      | 100 % | 100 % | 0 %    | 0 %     |
| 186.2Z    | Roksdalsvassd. | 5     | 4      | 11             | 20      | 100 % | 100 % | 0 %    | 0 %     |
| 186.62Z   | Bleikvassd.    | 3     | 0      | 1              | 4       | 0 %   | 0 %   | 100 %  | 0 %     |
| 189.3Z    | Renså          | 1     | 2      | 0              | 3       | 100 % | 0 %   | 0 %    | 100 %   |
| 191.Z     | Salangsvassd.  | 12    | 33     | 4              | 49      | 100 % | 100 % | 0 %    | 0 %     |
| 194.Z     | Laukhelle      | 8     | 3      | 9              | 20      | 100 % | 100 % | 0 %    | 0 %     |

\*Unique code for Norwegian watercourse outlets issued by The Norwegian Water Resource and Energy Directorate (NVE).
